# Supplementary material for: Tetracycline Removal through the Synergy of Catalysis and Photocatalysis by Novel NaYF4:Yb,Tm@TiO2-Acetylacetone Hybrid Core-Shell Structures
Source: MDPI journal article supplement (doi:10.3390/ijms24119441), 2023-05-29
Supplement: s1 [file s1]

Supplementary file:

# Tetracycline Removal through the Synergy of Catalysis and Photocatalysis by Novel NaYF<sub>4</sub>:Yb,Tm@TiO<sub>2</sub>-Acetylacetone Hybrid Core-Shell Structures

Lidija Mančić <sup>1,\*</sup>, Lucas A. Almeida <sup>2</sup>, Tamires M. Machado <sup>2</sup>, Jessica Gil-Londoño <sup>2</sup>, Ivana Dinić <sup>1</sup>, Miloš Tomić <sup>1</sup>, Smilja Marković <sup>1</sup>, Paula Jardim <sup>3</sup> and Bojan A. Marinković <sup>2,\*</sup>

<sup>1</sup> Institute of Technical Sciences of SASA, 11000 Belgrade, Serbia;  
ivana.dinic@itn.sanu.ac.rs (I.D.); milos.tomic@itn.sanu.ac.rs (M.T.);  
smilja.markovic@itn.sanu.ac.rs (S.M.)

<sup>2</sup> Department of Chemical and Materials Engineering, Pontifical Catholic University of Rio de Janeiro (PUC-Rio), Rio de Janeiro 22453-900, Brazil

<sup>3</sup> Department of Metallurgical and Materials Engineering, Federal University of Rio de Janeiro, Rio de Janeiro 21941-853, Brazil

\* Correspondence: lidija.mancic@itn.sanu.ac.rs (L.M.); bojan@puc-rio.br (B.A.M.)

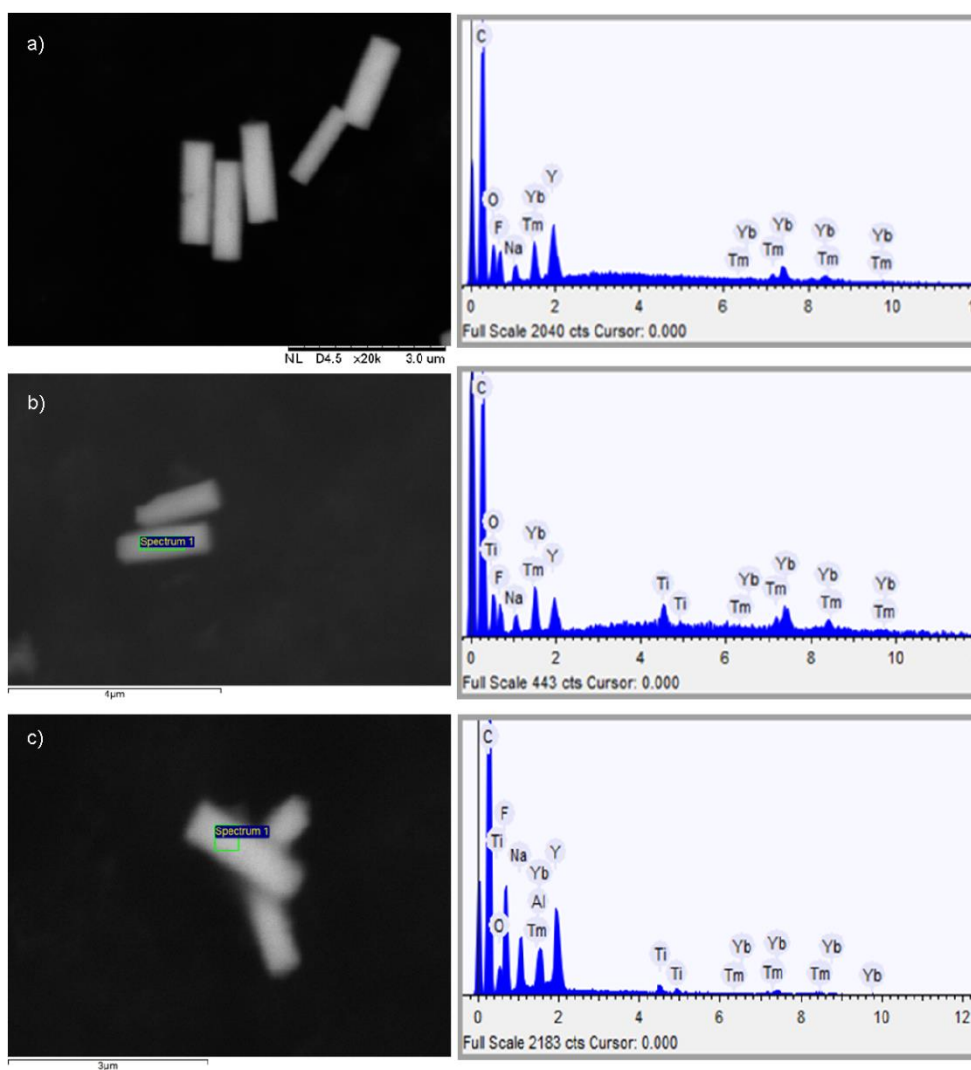

Figure S1. SEM/EDS of NaYF<sub>4</sub>:Yb,Tm (a) NaYF<sub>4</sub>:Yb,Tm@TiO<sub>2</sub>-Acac (b) and NaYF<sub>4</sub>:Yb,Tm@TiO<sub>2</sub>-Acac 300 core-shell particles (c).

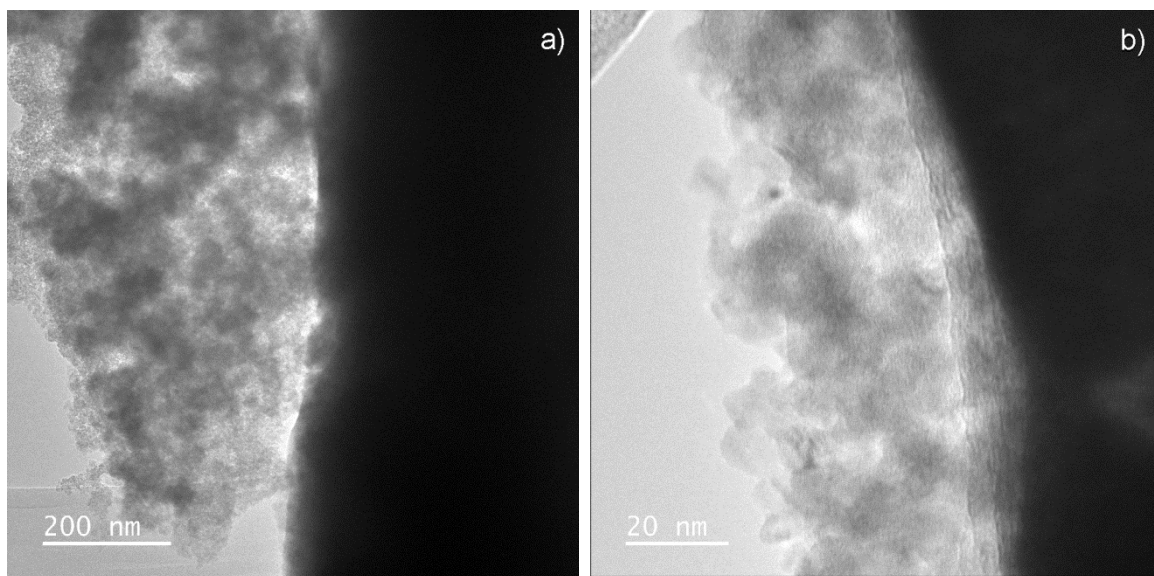

Figure S2. TEM of NaYF<sub>4</sub>:Yb,Tm@TiO<sub>2</sub>-Acac (a) and NaYF<sub>4</sub>:Yb,Tm@TiO<sub>2</sub>-Acac 300 core-shell particles (b).

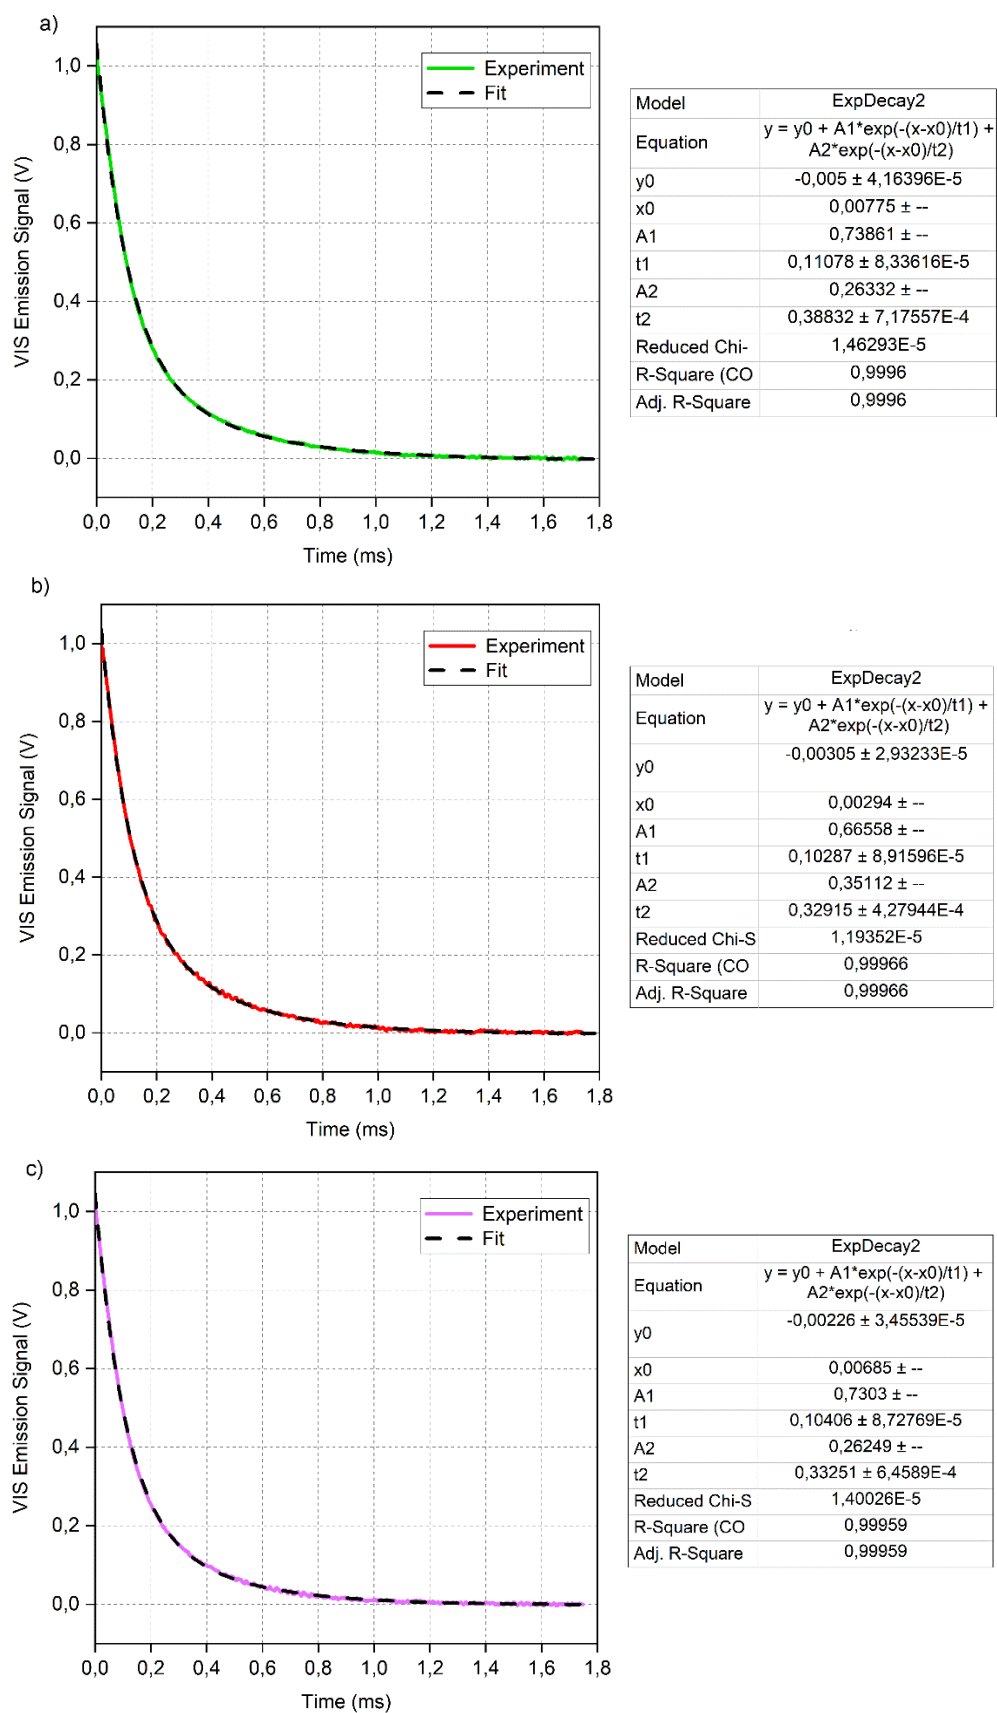

Figure S3. Decay curves of Vis emission for NaYF<sub>4</sub>:Yb,Tm particles (a), NaYF<sub>4</sub>Yb,Tm@TiO<sub>2</sub>-Acac (b) and NaYF<sub>4</sub>Yb,Tm@TiO<sub>2</sub>-Acac 300 core-shell structure (c).
